# Supplementary material for: Lack of memory recall in human CD4 T cells elicited by the first encounter with SARS-CoV-2
Source: PubMed Central journal article supplement — iScience. 2024 May 17;27(6):109992. doi: 10.1016/j.isci.2024.109992 (PMC11166706; doi:10.1016/j.isci.2024.109992), 2024-05-17
Supplement: mmc1.pdf [file mmc1.pdf]

**iScience, Volume 27**

**Supplemental information**

**Lack of memory recall in human**

**CD4 T cells elicited by the first**

**encounter with SARS-CoV-2**

**Katherine A. Richards, Siriruk Changrob, Paul G. Thomas, Patrick C. Wilson, and Andrea J. Sant**

| SARS-CoV-2 Protein                                        | Number of amino acids | Number of Peptides (17-mers, 11aa overlap) | Protein Sequence                                                                                                                                                                                                                                                                                                                                                                                                                                                                                                                                                                                                                                                                                                                                                                                                                                                                                                                                                                                                                                                                                                                                                                                                                                                                                                                                                                                                                                                                                                                                                                                                                                                                                                                                                                                                                                                                                                                                               | Accession Number |
|-----------------------------------------------------------|-----------------------|--------------------------------------------|----------------------------------------------------------------------------------------------------------------------------------------------------------------------------------------------------------------------------------------------------------------------------------------------------------------------------------------------------------------------------------------------------------------------------------------------------------------------------------------------------------------------------------------------------------------------------------------------------------------------------------------------------------------------------------------------------------------------------------------------------------------------------------------------------------------------------------------------------------------------------------------------------------------------------------------------------------------------------------------------------------------------------------------------------------------------------------------------------------------------------------------------------------------------------------------------------------------------------------------------------------------------------------------------------------------------------------------------------------------------------------------------------------------------------------------------------------------------------------------------------------------------------------------------------------------------------------------------------------------------------------------------------------------------------------------------------------------------------------------------------------------------------------------------------------------------------------------------------------------------------------------------------------------------------------------------------------------|------------------|
| ORF1ab1 NSP1 Leader Protein                               | 180                   | 36                                         | MESLVPGFNEKTHVQLSLVPLVLRVDFVIRGFGDSVEEVLSEARQHKDGTGCLVEKGVLPQLQEPYVFIKRSRDARTAPHGHVMMVFLVA<br>ELEGIQYGRSGRTEGLVLPVHVEIPVAYRKLRRKNGKAGGHSYGADLSFDLDELGTDPYEDFQENWNTKHSQVTRMLRELINGG                                                                                                                                                                                                                                                                                                                                                                                                                                                                                                                                                                                                                                                                                                                                                                                                                                                                                                                                                                                                                                                                                                                                                                                                                                                                                                                                                                                                                                                                                                                                                                                                                                                                                                                                                                             | YP_009725297.1   |
| ORF1ab1 NSP2                                              | 638                   | 130                                        | AYTRVVDNDFCGDPGVEPLKIDLLARAGKASCTSEQLDFDITKRGVYCCREHEJIAWYTERSEKVELQTPFEIKLAKKFDTPNGECNPFV<br>FPLNSIIKTIQPRVEKKLDGFMGRIRSYVPVSPNECNQMLCLSTMKCDHCGETSQWQDFVKAATCEFCGNTLENKAGTTCGYLPQNAV<br>VKYCPACHNSEVGPESHLEAYHNESGLTKLRKGGRTIAFGGCVFVSGCHNKAAYVPRASANIQCNTGVGESEGDNDLLEILQKE<br>KVNINIVGDFKNEEIIAIFLASFASSTAFVETKGLDYKAFKQIVESCGNFVTKGKAKKAGAWNIQEKQSLPLVAFASEAARVRSIFSR<br>LETAQNSVRVLQAAITLDIGISQYLRUADMMFTSDLATNNLVMAYITGGVQLTSQWLTNIFGTYEKLKPLVDWLEEFKKEGVFLP<br>RDGWEIFVSTIACEIVGGQVITCAKEIKESVQTFKLVNFKLALCADSIHGGAKKALNGETFVTHSKGLRKCVRSEETGLMLPKAKP<br>EIFFLEGETLPEVLEVEVLLKGLDQLPEQPTSEAVEAPLVGTPVQINGLMLEIKDTEKYCALANMMVTNNTFTSKGG                                                                                                                                                                                                                                                                                                                                                                                                                                                                                                                                                                                                                                                                                                                                                                                                                                                                                                                                                                                                                                                                                                                                                                                                                                                                                                                 | YP_009725298.1   |
| ORF1ab1 NSP3 Papain like Proteinase                       | 1945                  | 387                                        | APTkvTfGGDDTIEVQGYKSVNITFELDERIDKVLNCKSAYTVELGTEVNEFACVAVADAVIKLQPVSELTPLGIDDEWSMATYYLFDSE<br>GFKLASHMYSVFPDFDEEGDCEEEFEPSTQYEYGETDDYQKPLEFGATSAALQPEEQEEDWLDLDDSQVGGQDGSSENOQT<br>TTIQITIVVQPELEMLTPVQVIEVNSFSGYLKTDNVIYKADIVAEAKVKTPTVVNAANVYLVKGGGAGALNKANAMQVESD<br>DYIATNGPLKVGSCVLSGHNLAHKLHVVGPNVNGEDIQLLKSAYENFQHEVLLAPLSAGIFGADPHILSRVCDVTFRVNLVAVFDFK<br>NLYDKLVSSFEMKSEKQVEQKIAEIPKEEVKPFITESPVEQRKDDKIKACVEEVTTLETFTLENLLYIDINGNLPDASTLVSDIDI<br>TFLDKDAPYIVGVDVQEVGLTAVIPTKAGGTTEMLAKALRKVPDNYITTPGQGLNGYVEEAKTVLKKCSAFYLSIISNEKIEGT<br>VSNWLNRELAHAEETRKLMPVCVETKAVISTIQRKYKIKIQEVDYGARFYFTSKTIVASUNTLNDLNETLVMPLGVYTHGLNLEEA<br>ARYMRSKVPATVSPDVAIYNGLTSSKTPPEHFITISLAGSYKDWYSQSGTQLGIEFLKRGDYSYVNSPTFTHDLQGVITFDON<br>LKTLSLREVRTIKVFTVDNIHLTQVDMSTMVYGGQFPTYLGDADVTKIKPHNSHEGKTFYVLPNDTDRVEAFYYHTDPDLSGRY<br>MSALNHTKKWYIPQVNGLTSIKWADNNCLATALLTQQLKELFNPALQDAVYRARAGEAANFALILAYCNKTVAGELGDVRETMYSYLF<br>QHANLDSKRVLNVCCTCGGQQLTKGVEAYMVMYMTLSYEQFKKGVQVICTCGKQATKYLVLQQESPFVMMSSAPWALHGLKFTTC<br>ASEYTGNYQCGHYKHTSKETLYIDGALLTKSSEYKPIITFVFKENSYTITTPVTKYLDGVVCTEIDPKLDNYKDNSTVTEQIPDLVQNP<br>PYPNASDFNFKVCNDFKADDLNLQTLGKYKPARLEKVTFFDPLDNGDVVAIDYKHVPSFKKAGLHKHPVWVHMMLNTPAKTYKNTWC<br>IRCLWSTKPVETSNSFVLSKEDAGQMDLACEDLKPVEEVENPTIQKQVLECNKVTTEVGDIIKPPANSLKITEVGGHTMLDAAAY<br>DNSLTIKPKNRSVLRLGLKTLATHGLAAVNSVPWDIANYAKPFLNKVSTTTNIVTRCLNRCVCTNYMPTFFYLLQLKCTFTFRSRIKAS<br>MPTTIAKNTKSVKGFCEASFNYLKSPLNFSLKLIWVLLSCLGSYVSTAALGLVMSNLGMSYCTGYREGLNSTNVTIATYCTGSPIC<br>SVCLSLDLSLTDYPSLETIQITISFKWDLTAFGLVAEWFILYTRFFVYGLAIAMQLFFSFAVHFISNSWMLUWLIQVQAPISAM<br>VVMYIFASFYVWKSIVHVDGNSSTCMCYKRNRRVRECTTIVNGVRRSFYVYANGGKGFCKLHWNVCVCDTFCAGSTFISDE<br>VARDLSLQKRPINPTDQSSYIVDSVTYKNGSIHLVYDKAGQTYRHSLSHFVNDLNRANTKGLPINVIVFDGSKCESSAKSASVYV<br>SQLMCPILLDQALVDVSDSAEAVKMFDAVYNTSFTFVPMKELTLVATAEALAKNSLDNLSTFISAARAGVDSVDKED<br>VVECLKSHQSDIIEVTGDSNNMLYTNKVENMTPRDLGACDCAARHINAQVAKSHIALIWNKDFMSLSEQLRQIRSAAKNLPFK<br>LTCATTRQVNVVTTKJALKGG | YP_009725299.1   |
| ORF1ab1 NSP4                                              | 500                   | 98                                         | KIVNNWKLQIKVTLVFLVAAYFYLTIPVHVMKSHDTFSEIIGYKAIIDGGVTRDIASDTCTCFANKHADFTWFQSRGGSYVNDKACPLIA<br>AVITREVGFPVPLGPTILRTNGDFLHLPVRSFSAVGNICTYPSKLEIYDIATISACVLAEECTIFKDAKGPVYCYDTNVLGSAVESLRP<br>DTRYVLMDDGSIQFNPNTLEGSVRYVTTDFSEYCRHGTCERSEAGVCVSTSRWVLLNDYRSVLPVGFVADVNLNMTFTPLQIPGAL<br>DISASIVAGGIVAVITCLAYFMFRRAFGSHYSHVAFNTLFLMSFTVLTCLPVYSLPQVSYVYLTYLTVLNDVSLAHQWVMVMTF<br>PLVPFWITAIYICISKHFYWFSSYLKRRVFNVSFSTFEAAALCTFLNEMKYLKRSDLPLTQYRNYLYNKYKYSFGAMQDTSYR<br>EAAACHLAKALNDFSNSGSDVLYQPPQTSITSAVLQ                                                                                                                                                                                                                                                                                                                                                                                                                                                                                                                                                                                                                                                                                                                                                                                                                                                                                                                                                                                                                                                                                                                                                                                                                                                                                                                                                                                                                                                       | YP_009725300.1   |
| ORF1ab1 NSP5 3C-like proteinase                           | 306                   | 61                                         | GFRKMAFSPGKVEGCMVQVTCGTTTLNGLWDDVYVPRHVICSTEDMLNPNYEDLLIRKSNHFLVQAGNVLRVGHISMQNCLVLLK<br>VDTANPKTPKRYFRVRIQPGQTFVSLACVNGSPSGVYQCAMRPNFTIKGSLNGSCVGFNIDYDCVFCYMHMLNTPGTGVTAGDPLEG<br>NFYGFVDRQTAQAAGDGTITITVNLWLAAYAVINDGRWFLNRRFTLLDNFLVAMKYNEPLTQDHDVILGLPSAQITGAVLDMCASL<br>KELLQNGMNRGTLQSGALLEDEFPTFDVYRQCSGVTFQ                                                                                                                                                                                                                                                                                                                                                                                                                                                                                                                                                                                                                                                                                                                                                                                                                                                                                                                                                                                                                                                                                                                                                                                                                                                                                                                                                                                                                                                                                                                                                                                                                                           | YP_009725301.1   |
| ORF1ab1 NSP6                                              | 290                   | 55                                         | SAVKRTIKGTHHWLLTLLSLLVQSTQWLSFFLYENAFLPFAMGIIAMSAFAMVFKHFKHAFCLFLPLSLIATVAFYNNVYMPAS<br>WVMRIMTVDMDVDTSLGFKLDCVMYASAVLMLTARTVYDGGARRVWLMNVLTVYKYNALQDQAIMSWALISYSNYS<br>GVVTVVMFLARGIVMVEYECFFITGNTLQQLMLVYCFGLVCTCYGLFLCLLNRVFRLLTGVYDVLSTQEFYRIMSQGLPKNNSIDAF<br>KLNIKLLGCVGGKPCIKVATVQ                                                                                                                                                                                                                                                                                                                                                                                                                                                                                                                                                                                                                                                                                                                                                                                                                                                                                                                                                                                                                                                                                                                                                                                                                                                                                                                                                                                                                                                                                                                                                                                                                                                                      | YP_009725302.1   |
| ORF1ab1 NSP7                                              | 83                    | 16                                         | SKMSDVCTSVLVSLSLQLRHESSSLKVAQCVQLHNDILLAKDTTEAFKEMVSLSVLSMQGAVDINKCEEMLDNRATQ                                                                                                                                                                                                                                                                                                                                                                                                                                                                                                                                                                                                                                                                                                                                                                                                                                                                                                                                                                                                                                                                                                                                                                                                                                                                                                                                                                                                                                                                                                                                                                                                                                                                                                                                                                                                                                                                                  | YP_009725303.1   |
| ORF1ab1 NSP8                                              | 198                   | 39                                         | AIASEFSLPSYAFATAQEAQEVANGDSEVLLKLSLNVAKSEFRDAAMQRKLEKMAADQAMTQMYKQARSEDKRAKVTSAM<br>QTMFLTLRKLNDALNINIANNARDGCVPLNIPLTAAKLMVVPIDNYTKNCTDGTFTYASALWEIQVVDADSKVILQSEISMDNSP<br>NLAWPLVITLALRANSVAVKLQ                                                                                                                                                                                                                                                                                                                                                                                                                                                                                                                                                                                                                                                                                                                                                                                                                                                                                                                                                                                                                                                                                                                                                                                                                                                                                                                                                                                                                                                                                                                                                                                                                                                                                                                                                            | YP_009725304.1   |
| ORF1ab1 NSP9                                              | 113                   | 21                                         | NNELPVALRQMSCAAAGTTQACTDNDALYANNYTKGRFVRLALLSDQLKWARFPKSDGTGTIYTELEPPCRVTDTPKPKGVYLYFIK<br>GLNLRNMGVLSGLAATVRLQ                                                                                                                                                                                                                                                                                                                                                                                                                                                                                                                                                                                                                                                                                                                                                                                                                                                                                                                                                                                                                                                                                                                                                                                                                                                                                                                                                                                                                                                                                                                                                                                                                                                                                                                                                                                                                                                | YP_009725305.1   |
| ORF1ab1 NSP10                                             | 139                   | 27                                         | AGNATEVPANSTVLSFCFAFYDAAKAYDYLAGGGPITNCVKMLCTHTGTQAIITVPEANNMQDESFGGASCCLYCRCHDHPNPKGF<br>CDLKGKVVQIPTTCANDPVGFTLKVCTVCGMVKWGGVCSQDLRQEMLQ                                                                                                                                                                                                                                                                                                                                                                                                                                                                                                                                                                                                                                                                                                                                                                                                                                                                                                                                                                                                                                                                                                                                                                                                                                                                                                                                                                                                                                                                                                                                                                                                                                                                                                                                                                                                                     | YP_009725306.1   |
| ORF1ab1 NSP12 RNA Dependent RNA Polymerase                | 932                   | 185                                        | SADAQSFNLRVCGVASARLTGCTGTDVYVYRAFDIYNDKVGAFKLTNCCRFQEKEDDNDLDSYFVVKRHTFSNYQHEETIYLLKD<br>CPAVAKHDFRFRIDGDMVPHISRQLTKYTMADLVYALRHFDGECNDLKEIIVLTYNCCDDYFNKDWYDFVENPDLRVAINGERV<br>QALKTVCFQDAMRNAGIVGLVLTLDNQDLNGNMYDFDGIQITPGSGVPPVDSYSLMLPILTRALTAESHVDTLTKYKDWDLKY<br>DFTTEERLDRYFWDQTYVHNCVCLDRCLHCAFVLFSTVFPPTSFGPLVKRIFVDGVPFVSTGYHFHGLHKNYDQWVHSHSR<br>LSFKELLYAADPAMHAASGNLLDRTCFSAALTNVAVFQTKPKNFQDFYAVSKGFFKEGSSVELKHFAFQDQNAALSYDDY<br>YRYNLPTMCIARQLLFLVVDYKDFCYDGGCINANQVNNLDSAGFPNKGWKAIRYDMSYEDQDLDAFTYRPNITITMNLK<br>YIASAKNRARTVAGVSICTMTRQFHQKLKLSIAARTGATVIGTSKFGWVHMLKTVSDVENPHMLGWDPKCDRAMPNMLR<br>MASLVLARKHTCCLSHRFYRLANECAQLSEMVMCGGSLYVKGPGTSSGDATTAYNSVFNCOAVTANWALLSDGNKIAKDYVR<br>NLQHLRYECLYRNRDVTDFVNEFYALRKHFSMMLSDDAVCFNSYASQGLVASIKNFSLVYQNNVFMSEAKWETDLTKGPH<br>FCSQHTMLVKGDDVYVLPDPDRILGAGCFVDDIVKTDGTLMIERFVLSAIDAPLTKHPNQYADVFHLVLYQRKLDHDLTGMHLD<br>YSVMLTNDNTSRVWEPFYEAMTYPTHVQLQ                                                                                                                                                                                                                                                                                                                                                                                                                                                                                                                                                                                                                                                                                                                                                                                                                                                                                                                                                                                                                                        | YP_009725307.1   |
| ORF1ab1 NSP13 Helicase                                    | 601                   | 119                                        | AVGACVLCNSQTSLRGACIRRFPCCKCYDHSVISHKLVLSVNPVCPNAGCDVTDVTLVGLGMSYCKSHKPPISFLCANGQVFLG<br>YKNTCVGSDNVTFDFAIATCDWNTAGDYLANTCTERLKLFAETLKAETEFLKSLYGIATVREVLSDRHELHWEVGRKPPRLNRYVFTGY<br>RVTKNSKQVIGEYTFEKDYGDAVYVRYGTTKLVNVDYVLTSHVMLPSAPLTPQEHYVRITGLYPLNSDEFSNNVANYQVGMQ<br>KYSTLQGGPPTGKSHFAGLALYPSARIYVITACSHAAYDVALCEKALKYLPDKSRIIPARARVECFDKFVNSTLQEVFVCTNALPDTADI<br>VVFDEISMATNYDLVSVNARLAKHCVGIDYPAQLPAPRTLLKGTLEPEYFNSVCLRMKTIQPDMLGTCCRCRPAIVDTVSAALVYDNLK<br>AHKDKSAQCVMFYKGIYHDSVAIIRPQIGVREFLTRNPAWRKAVFISPNVQNAVASKILGPTQTVDSSQSEYDYVIFTQTETETA<br>HSCNVNRFVAITRAKVLGILCIMSDDRLDQLFTSLEIPRRNVATLQ                                                                                                                                                                                                                                                                                                                                                                                                                                                                                                                                                                                                                                                                                                                                                                                                                                                                                                                                                                                                                                                                                                                                                                                                                                                                                                                                                  | YP_009725308.1   |
| ORF1ab1 NSP14 3' to 5' Endonuclease, N7-Methyltransferase | 527                   | 103                                        | AENVTLGDKCSDKVIQHTGHTQAPHLSDVTKFKTEGLCVDIPGIPKDMTYRRLSMMGMFKNYQVNGYPMFITREAIHRVRAWIGFD<br>VEGCHATREAVGTNLRLQLGFTGNLVAVPTGVYDTPNNTDSRYSAKPPPGDQFKLHPLMKYGLPWNVRIKIVQMSLDTLKNLSDR<br>VVFVLWAHGFELTSMKYVNIKGPRTCCLDRTAFCSTASDYACWHHSIGFDYVYVPFMIDVQWGFTGNLQSNHLYCQVHGNAG<br>VASCDIIMTRCLAHECFVVRVDWITIEYPIIGDEKINAAACRQVQHMVKAALLADKFPVLDHIGNKPAIKCVPQAQVDEWKFYDAQPCSD<br>KAYKIEELFYSATHSDKFTDGLVFLWNCVNDRYPANSIVCRFDRVLSNLNPLGCDGGSLVYVNHKHFAPFDKSAFVNLQPLFFPYSDS<br>PCESHKQVSDIVYPLKSACTICRLNCGAVCRHHAENEYRLDANMMSIAGFSLWYKQFDTYNLWNFTRLQ                                                                                                                                                                                                                                                                                                                                                                                                                                                                                                                                                                                                                                                                                                                                                                                                                                                                                                                                                                                                                                                                                                                                                                                                                                                                                                                                                                                                                       | YP_009725309.1   |
| ORF1ab1 NSP15 endoRNase                                   | 346                   | 67                                         | SLENVAFNVWNGHFDGGQGEVPPSIINNVTYTKV DGVDELFEKNKTLPVNVAFELWAKRNKVPVVKILNGLVDIAANTVYIWDYKR<br>DAPAHISTIGVCSMTDIANKPTETICAPTVFFDGRVDGQDLFRNARNGLVTEGVSVKGLQPSVGPQASLNGVTVLGEAVKTFQPFYKMR<br>DGVVVQLPETYFTQSRNLQEFKPRSQMIEIDFLEAMDEFIERLEGYAFEHIVYDGFSHSQGLLGLIKARFKFESPELAFNNDST<br>VKNYFIDAQTGSSKVCVSIIDLLDFFVHISQDLSVSVKVVITDIYTESFMLWCKDGHVETFPKPLQ                                                                                                                                                                                                                                                                                                                                                                                                                                                                                                                                                                                                                                                                                                                                                                                                                                                                                                                                                                                                                                                                                                                                                                                                                                                                                                                                                                                                                                                                                                                                                                                                             | YP_009725310.1   |
| ORF1ab1 NSP16 2'-O-Ribose-Methyltransferase               | 298                   | 58                                         | SSQAWQGVAMPNLYKMQRMLEKCDLQNGDSATPKGIMMNVAKYTLQCLQYLTLVAPYNNRIRHFAGGSDKGVAPGTAVLR<br>QWPLPTGLLVDSDLNDFSDASDITGDCAVHTANKWDUIISDMYDPTKNTKENDSEKFFTYICGFIQQLALGSGVAIKITESHVWN<br>ADLYKLMGHFAWTAFTVNTMNASSEAFILGNYLGRQREQIDGVYMHANFYWRNTNPIQLSSYSLFDMKPKPLRGTAVMSLKEGQ<br>INDMILSLSKGRILIRENNRVISSDVLVNN                                                                                                                                                                                                                                                                                                                                                                                                                                                                                                                                                                                                                                                                                                                                                                                                                                                                                                                                                                                                                                                                                                                                                                                                                                                                                                                                                                                                                                                                                                                                                                                                                                                            | YP_009725311.1   |

| SARS-CoV-2 Protein     | Number of amino acids | Number of Peptides (17-mers, 11aa overlap) | Protein Sequence                                                                                                                                                                                                                                                                                                                                                                                                                                                                                                                                                                                                                                                                                                                                                                                                                                                                                                                                                                                                                                                                                                                                                                                                                                                                                                 | Accession Number |
|------------------------|-----------------------|--------------------------------------------|------------------------------------------------------------------------------------------------------------------------------------------------------------------------------------------------------------------------------------------------------------------------------------------------------------------------------------------------------------------------------------------------------------------------------------------------------------------------------------------------------------------------------------------------------------------------------------------------------------------------------------------------------------------------------------------------------------------------------------------------------------------------------------------------------------------------------------------------------------------------------------------------------------------------------------------------------------------------------------------------------------------------------------------------------------------------------------------------------------------------------------------------------------------------------------------------------------------------------------------------------------------------------------------------------------------|------------------|
| ORF3a                  | 275                   | 54                                         | MDLFRIRIFTGTIVTLKQEKIDATPSDFVRATATIPIQASLPFGWLVVGVALLAVFQSASKIITLKKRWQLALSKGVHFVNCNLLLFVTYSH<br>LLLYAAGLEAPFLYLALVYFQSIINFVRIIMRLWLWCKRKNPLLYDANFYLCWHTNCDYDIPYNSVTSIWIYTSDDGTTSPISEHDYQIG<br>GYTEKWESGVKDCVLLHSYFTSDYYQLYSTQLSDTDTGVEHVTFYINKIIVDEPEEHVQIHTIDGSSGVVNPVMEPIYDEPTTTTSVPL                                                                                                                                                                                                                                                                                                                                                                                                                                                                                                                                                                                                                                                                                                                                                                                                                                                                                                                                                                                                                          | QHD43417.1       |
| ORF6                   | 61                    | 11                                         | MFHLVDFQVTAIEILLIIMRTFKVSIWNLDYIINLIKNLSKSLTENKYSQLEEQPMIED                                                                                                                                                                                                                                                                                                                                                                                                                                                                                                                                                                                                                                                                                                                                                                                                                                                                                                                                                                                                                                                                                                                                                                                                                                                      | QHD43420.1       |
| ORF7a                  | 121                   | 24                                         | MKILFLALITLATCELYHYQECVRRGTTVLLKEPCSSGTYESPFHPLADNKFALTCFSTQFAFACPDGVKHHVQRLRARSVSKPLIRQEEVQ<br>ELYSPIFLVAAIVFILTCLTKRKE                                                                                                                                                                                                                                                                                                                                                                                                                                                                                                                                                                                                                                                                                                                                                                                                                                                                                                                                                                                                                                                                                                                                                                                         | QHD43421.1       |
| ORF8                   | 121                   | 22                                         | MKFLVFLGIITVAAFHQECSLQSDCTQHQPVVVDDPCPIHFYSKWYIRVGRARKSAPLIELCVDEAGSKSPIQYIDIGNYTVSLCPTINCCQEP<br>KLGSLVVRCSFYEDFLYHVDVRLDFI                                                                                                                                                                                                                                                                                                                                                                                                                                                                                                                                                                                                                                                                                                                                                                                                                                                                                                                                                                                                                                                                                                                                                                                     | QHD43422.1       |
| ORF10                  | 38                    | 9                                          | MGYINVFAPFTIYSLLCRMNSRNVIQVDDVNFNL                                                                                                                                                                                                                                                                                                                                                                                                                                                                                                                                                                                                                                                                                                                                                                                                                                                                                                                                                                                                                                                                                                                                                                                                                                                                               | QHI42199.1       |
| Spike (S, ORF2)        | 1273                  | 253                                        | MFVFLVLLPSSQCVNLTTRTQLPPAYTNSFTRGVVYDPKVFSSVHSTQDLPLPFSNVTWFHAIHVSNGTNGKRFNPLPFDNGVY<br>FASTEKSNIRGWIFGTTLDKSTQSLVNNATNVIVKCEFOFNDPFLGVYYHKNKNSWMESEFRVYSSANNCFTFEYVSQPFMLDLEK<br>QGNFKNLRFEVFNIDGFKIYKHTPINLVRDLQPGFSALEPLVDPIGINITRFQTLALHRSYLTGDS55GWTAGAAAYVGYLQRTFL<br>LKYNENGTITDAVDCALDPLSETKCTLSFTVEKGIYQTSNFRVQPTESIVRFNITNLCPEGFENATRFASVVAWNRKRISNCVADYSVLY<br>NSASFSTFKCYGVSPKLNLDLCTNVAADFVIRGDEVRIQAPGQTKIADYNYKLPDFTGCVIAWNSNLDKSKVGGNYNYLRLFRKSNL<br>KPFERDITEIYQAGSTPCNGVEGFNCFYPLQSYGFPQPTNGVGYQPYRVVLSFELLHAPATVCGPKKSTNLVKNKCVNFNGLTGTGVL<br>ESNKKFLPFQGRDIADTTDAVRDPTLEIDLITPCSGFVGVSVITPGTNSNQAVLYQDNCVTEVPVAIHADQLTPTWRVYSTGNSVF<br>QTRAGCLIGAHEVNNSEYCDPIGAGICASYQTQNSPRRARSVASQSIIAVTMSLGAENSVAYSNSIAIPTNFISVTEILPVSMTKTSV<br>DCTMYICGDSSTECNLLQLQYSGFCTQLNRALTGIAVEQDKNTQEVFAQKQIYKTPPIKDFGFFNSQJLPDPSKPSKRSFIEDLLNKVTLA<br>DAGFIKYGDCLDGIIAARDLCAQFNGLTLPPLLDDEMIQYTSALLAGTISGWTFGAGAAIQPFAMQAMAYRFNGIGVTVQNVLYEN<br>QKLIANQNSAIGKIQDSLSSTASALGKLDVNVQNAQALNTLVKQLSSNFGAISSVLDLISRLDKVEAEVQIDRLITGRLOSQTYYTQQ<br>LIRAAEIRASANAATKMSCEVLGQSKRVDFCGKGYHLMSPQASPHGVVFLHVTYVPAQEKNFITAPAIHGDGKAHPREGVYFVMSNGTH<br>VWVTKRNFYEPQIITDNTFVSGNCDVIGIVNNTVYDLPQELDSFKEELDKYFKNHTSPDVLGDISGINASVNIQKEIDRLNEVAKNL<br>NESLIDLQELGKYEYKWPWYIWLGFIAGLIAIVMTIMLCM2SCCSCLGKCCSCGSCCKFDEDDSEPVKGLKVIHYT | QHD43416.1       |
| Envelope (E, ORF4)     | 75                    | 13                                         | MYSFVSEETGTLVNSVLLFLAFVFLVTLAILTALRLCAYCCNIVNVLKPSFYVYSRVKLNLSRVPDLLV                                                                                                                                                                                                                                                                                                                                                                                                                                                                                                                                                                                                                                                                                                                                                                                                                                                                                                                                                                                                                                                                                                                                                                                                                                            | QHD43418.1       |
| Membrane (M, ORF5)     | 222                   | 42                                         | MADSNGTITVEELKLEQWNLVIGFLFTWICLLQFAYANRRNRYIIKLIFLWLLWPVTLACFVLAAYRINWITGGIAIAMACLGLMW<br>LSYFIASFRLFARTSMWFSNPETNILLNVPLHGTILRPLESELVIGAVILRHLRIAGHLGRCDIKDLPEKITVATSRITLKYLGASQKRV<br>GDSGFAAYSRIRYGNKLNTHSSSDNIALLVQ                                                                                                                                                                                                                                                                                                                                                                                                                                                                                                                                                                                                                                                                                                                                                                                                                                                                                                                                                                                                                                                                                          | QHD43419.1       |
| Nucleocapsid (N, ORF9) | 419                   | 82                                         | MSDNGPQNQRNAPRITGGPSDSTGSNNGERSGARSQRRPQGLPNNTASWFTALTQHGKEDLKFPRGQGVPIINTNSPDDQIGYYR<br>RATRIRGGDGKMKDLSPRWYFYLLGTGPEAGLPYGANKDGIWVATEGALNTPKDHIGTRNPANNAIIVLQLPQGTTLKPGFYAEGSRGG<br>SQASSRSSRSRNSLRNSTPGSSRGTSPARMAAGNGDAAALLLDRNLQLESKMSKGGQQQGTQVTKSAAEASKPKRQRTATKAY<br>NVTQAFGRRGPEQTQGNFGDQELRQGTQDYKHWPQIAQFAPSAAFFGMSRIGMEVTPSGTWTLYTGAIKLDKDPNFKDQVILLNKHI<br>DAYKTFPPTEPKKKKKKADETQALPQRKKQQTVTLPLAADLDFSKLQSQSMSSADSTQA                                                                                                                                                                                                                                                                                                                                                                                                                                                                                                                                                                                                                                                                                                                                                                                                                                                                              | QHD43423.2       |

Supplemental Table 1. SARS-CoV-2 protein sequences used to create the peptide pools, with indicating regarding nomenclature, size, and accession numbers <sup>1,2</sup>.

## References

1. Wu, F., Zhao, S., Yu, B., Chen, Y.M., Wang, W., Song, Z.G., Hu, Y., Tao, Z.W., Tian, J.H., Pei, Y.Y., et al. (2020). A new coronavirus associated with human respiratory disease in China. *Nature* 579, 265-269. 10.1038/s41586-020-2008-3.
2. Yoshimoto, F.K. (2020). The Proteins of Severe Acute Respiratory Syndrome Coronavirus-2 (SARS CoV-2 or n-COV19), the Cause of COVID-19. *Protein J* 39, 198-216. 10.1007/s10930-020-09901-4.

| Unique         |             |                      | Conserved      |             |                      |
|----------------|-------------|----------------------|----------------|-------------|----------------------|
| Peptide Number | Amino Acids | Sequence             | Peptide Number | Amino Acids | Sequence             |
| p1             | 1-17        | MFVFLVLLPLVSSQCVN    | p54            | 266-282     | YVGYLQPRTFLLKYNEN    |
| p2             | 6-22        | VLLPLVSSQCVNLTTRT    | p55            | 271-287     | QPRTFLLKYNENGTITD    |
| p3             | 11-27       | VSSQCVNLTTRTQLPPA    | p56            | 276-292     | LLKYNENGTITDAVDCA    |
| p4             | 16-32       | VNLTTRTQLPPAYTNSF    | p57            | 281-297     | ENGTITDAVDCALDPLS    |
| p5             | 21-37       | RTQLPPAYTNSFTRGVY    | p58            | 286-302     | TDAVDCALDPLSETKCT    |
| p7             | 31-47       | SFTRGVYYPDKVFRSSV    | p59            | 291-307     | CALDPLSETKCTLKSF     |
| p8             | 36-52       | VYYPDKVFRSSVLHSTQ    | p70            | 346-362     | RFASVYAWNRKRISNCV    |
| p13            | 61-77       | NVTWFHAIHVSNGTNGTK   | p71            | 351-367     | YAWNRKRISNCVADYSV    |
| p14            | 66-82       | HAIHVSNGTNGTKRFDNF   | p72            | 356-372     | KRISNCVADYSVLYNSA    |
| p16            | 76-92       | TKRFDNFVLPFNDGVYF    | p143           | 711-727     | STAIPTNFTISVTTTEIL   |
| p20            | 96-112      | EKSNIIRGWIFGTTLDS    | p150           | 746-762     | STECSNLLQYGSFCTQ     |
| p29            | 141-157     | LGVYHKNNKSWMESEF     | p151           | 751-767     | NLLQYGSFCTQLNRAL     |
| p30            | 146-162     | HKNKSWMESEFRVYSS     | p152           | 756-772     | YGSFCTQLNRALTGI      |
| p31            | 151-167     | SWMESEFRVYSSANNCT    | p162           | 806-822     | LPDPSKPSKRSFIEDLL    |
| p32            | 156-162     | EFRVYSSANNCTFEYVS    | p163           | 811-827     | KPSKRSFIEDLLFNKVT    |
| p33            | 161-177     | SSANNCTFEYVSQPFLLM   | p164           | 816-832     | SFIEDLLFNKVTLADAG    |
| p34            | 166-182     | CTFEYVSQPFLLMDLEGK   | p165           | 821-837     | LLFNKVTLADAGFIKQY    |
| p35            | 171-187     | VSQPFLLMDLEGKGNFK    | p166           | 826-842     | VTLADAGFIKQYGDCLG    |
| p42            | 206-222     | KHTPINLVRDLPLQGFSA   | p169           | 841-857     | LGDI AARDL ICAQKFN   |
| p43            | 211-227     | NLVRDLPLQGFSALEPLV   | p170           | 846-862     | ARDL ICAQKFNGLTVLP   |
| p44            | 216-232     | LPQGFSALEPLVDLPIG    | p171           | 851-867     | CAQKFNGLTVLPPLTD     |
| p45            | 221-237     | SALEPLVDLPIGINITR    | p172           | 856-872     | NGLTVLPPLTDEMIAQ     |
| p46            | 226-242     | LVDLPIGINITRFQTL     | p180           | 896-912     | IPFAMQMAYRFNGIGVT    |
| p47            | 231-247     | IGINITRFQTLALHRS     | p181           | 901-917     | QMAYRFNGIGVTQNVLY    |
| p49            | 241-257     | LLALHRSYLTGDSSSG     | p182           | 906-922     | FNGIGVTQNVLYENQKL    |
| p73            | 361-377     | CVADYSVLYNSASFSTF    | p183           | 911-927     | VTQNVLYENQKLIANQF    |
| p75            | 371-387     | SASFSTFKCYGVSPTKL    | p184           | 916-932     | LYENQKLIANQFN SAIG   |
| p81            | 401-417     | VIRGDEV RQIAPGQTGK   | p185           | 921-937     | KLIANQFN SAIGKI QDS  |
| p87            | 431-447     | GCVI AWNSNLD SKVGG   | p188           | 936-952     | DSLSTASALGKLDQDVV    |
| p88            | 436-452     | WNSNLD SKVGGNYNYL    | p189           | 941-957     | TASALGKLDQDVVNQNAQ   |
| p92            | 456-472     | FRKSNLKPFFERDISTEI   | p190           | 946-962     | GKLDQDVVNQNAQNTL     |
| p93            | 461-477     | LKPFERDISTEIYQAGS    | p191           | 951-967     | VVNQNAQALNTLVKQLS    |
| p94            | 466-482     | RDISTEIYQAGSTPCNG    | p192           | 956-972     | AQALNTLVKQLSSNF GA   |
| p95            | 471-487     | EIYQAGSTPCNGVEGFN    | p193           | 961-977     | TLVKQLSSNF GAIS SVL  |
| p102           | 506-522     | QPYRVVLSFELLHAPA     | p194           | 966-982     | LSSNF GAIS SVLNDILS  |
| p103           | 511-527     | VVLSFELLHAPATVCGP    | p195           | 971-987     | GAIS SVLNDILSRLDKV   |
| p104           | 516-532     | ELLHAPATVCGPKKSTN    | p196           | 976-992     | VLNDILSRLDKVEAEVQ    |
| p105           | 521-537     | PATVCGPKKSTNLVKNK    | p197           | 981-997     | LSRLDKVEAEVQIDRLI    |
| p113           | 561-577     | PFQQGRDIADTTDAVR     | p198           | 986-1002    | KVEAEVQIDRLITGRLQ    |
| p120           | 596-612     | SVITPGTNTSNQVAVLY    | p199           | 991-1007    | VQIDRLITGRLQSLQTY    |
| p123           | 611-627     | LYQDVNCTEVFVAIHAD    | p200           | 996-1012    | LITGRLQSLQTYVTQQL    |
| p127           | 631-647     | PTWRVYSTGSNVQTRA     | p201           | 1001-1017   | LQSLQTYVTQQLIRAAE    |
| p136           | 676-692     | TQTNSPRRARSVASQSI    | p205           | 1021-1037   | SANLAATKMSCEVLGQS    |
| p138           | 686-702     | SVASQSI IAYTMSLGAE   | p206           | 1026-1042   | ATKMSCEVLGQSKRVDF    |
| p139           | 691-707     | SIIAYTMSLGAENSVAY    | p207           | 1031-1047   | ECVLGQSKRVDFCGKGY    |
| p146           | 726-742     | ILPVSMTKTSVDC TMYI   | p208           | 1036-1052   | QSKRVDFCGKGYHLM SF   |
| p147           | 731-747     | MTKTSVDC TMYICGDST   | p209           | 1041-1057   | DFCGKGYHLM SF PQSAP  |
| p154           | 766-782     | ALTGIAVEQDKNTQEVF    | p210           | 1046-1062   | GYHLM SF PQSAPHG VVF |
| p155           | 771-787     | AVEQDKNTQEVFAQVKQ    | p211           | 1051-1067   | SFPQSAPHG VVFLHV TY  |
| p156           | 776-792     | KNTQEVFAQVKQIYKTP    | p212           | 1056-1072   | APHGVVFLHV TYVPAQE   |
| p157           | 781-797     | VFAQVKQIYKTPPIKDF    | p228           | 1136-1152   | TVYDPLQPELDSFKEEL    |
| p158           | 786-802     | KQIYKTPPIKDFGGFNF    | p229           | 1141-1157   | LQPELDSFKEELDKYFK    |
| p159           | 791-807     | TPPIKDFGGFNFSQILP    | p230           | 1146-1162   | DSFKEELDKYFKNHTSP    |
| p160           | 796-812     | DFGGFNFSQILPDP SKP   | p231           | 1151-1167   | ELDKYFKNHTSPD VDLG   |
| p161           | 801-817     | NFSQILPDP SKPSKRSF   | p232           | 1156-1172   | FKNHTSPD VDLGDISGI   |
| p179           | 891-907     | GAALQIPFAMQMAYRFN    | p237           | 1181-1197   | KEIDRLNEVAKNLNESL    |
| p215           | 1071-1087   | QEKNF T TAPAICH DGKA | p238           | 1186-1202   | LNEVAKNLNESLIDLQE    |
| p226           | 1126-1142   | CDVVIGIVNNTVYDPLQ    | p239           | 1191-1207   | KNLNESLIDLQELGKYE    |
| p227           | 1131-1147   | GIVNNTVYDPLQPELDS    | p240           | 1196-1212   | SLIDLQELGKYEQYIKW    |
| p244           | 1216-1232   | IWLGFIAGLIAIVMVTI    | p241           | 1201-1217   | QELGKYEQYIKWPWYIW    |
| p245           | 1221-1237   | IAGLIAIVMVTIMLCCM    | p242           | 1206-1222   | YEQYIKWPWYIWLGFIA    |

Supplemental Table 2. SARS-CoV-2 Spike peptides included in the unique and conserved peptide pools used in Figure 8 and Supplemental Figure 3.

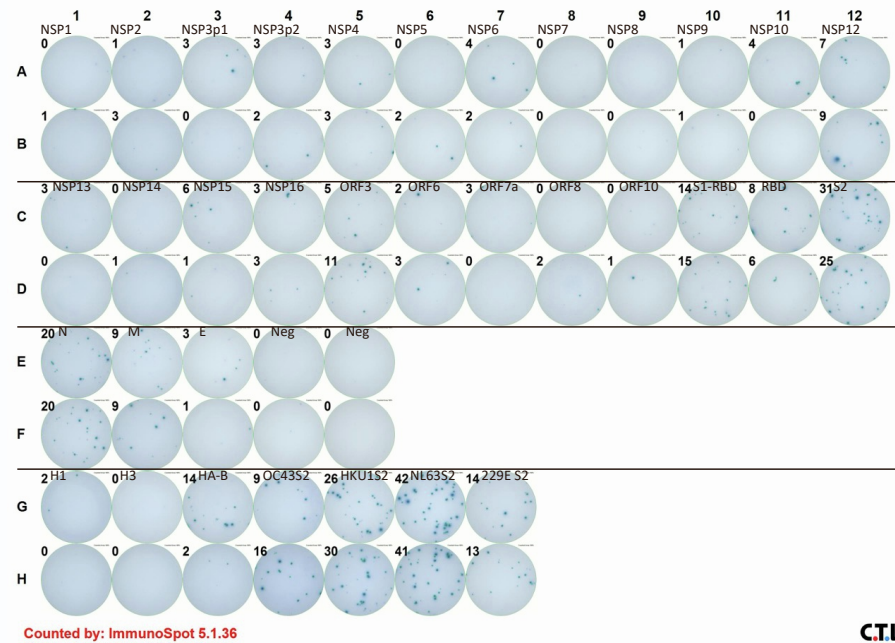

CTL

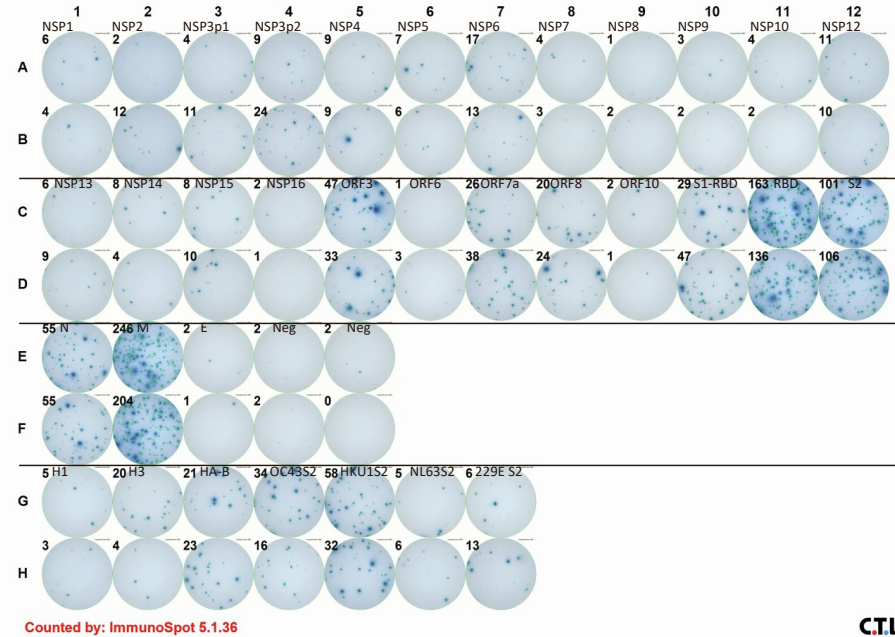

CTL

Supplemental Figure 1. Representative ELISPOT plate images from two SARS-CoV-2 subjects. The stimulation condition (peptide pool) is indicated above the duplicate wells, which are vertical. The spot count for each well is shown in the upper left corner of the well.

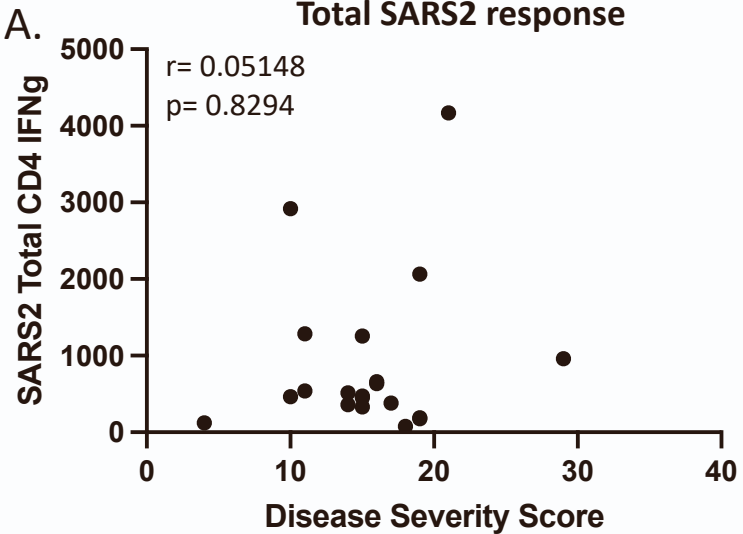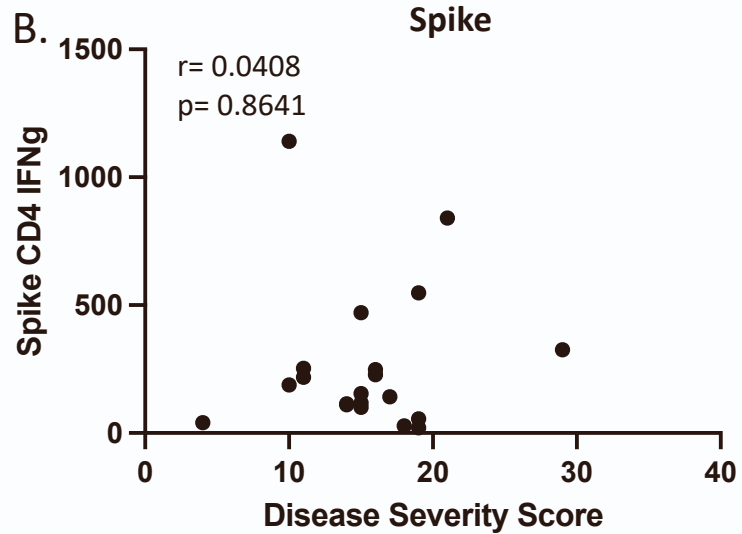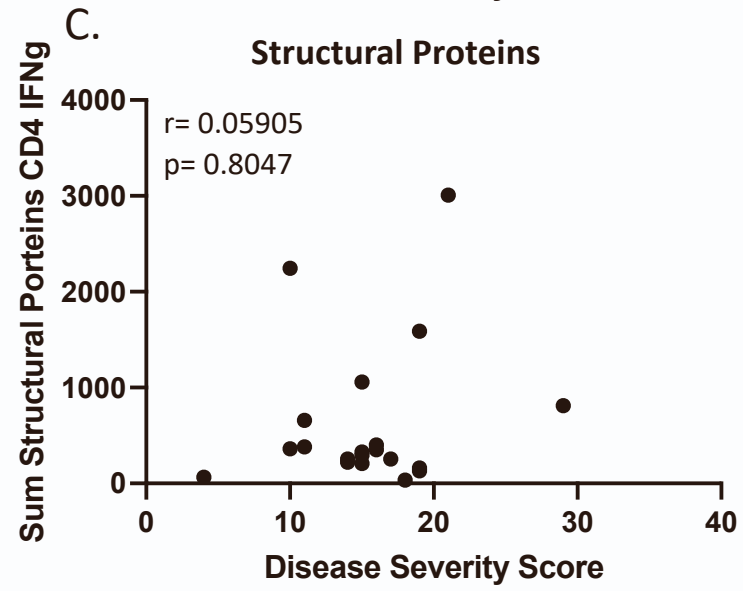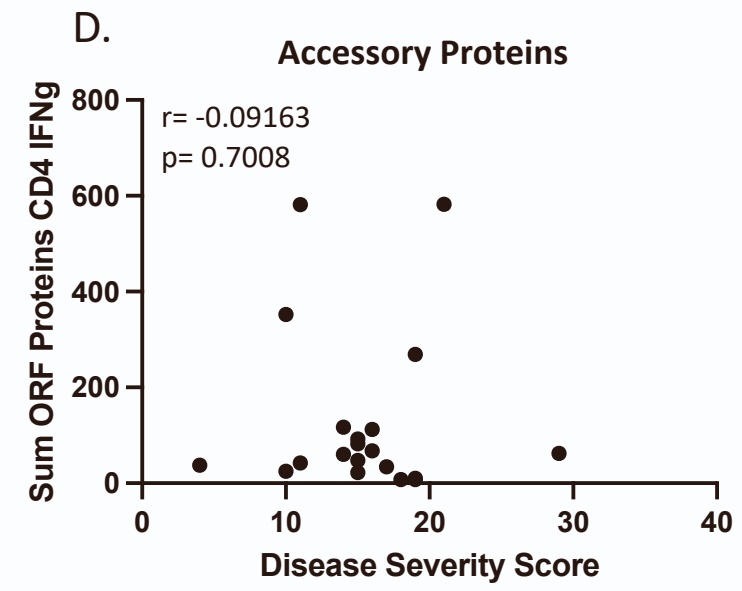

Supplemental Figure 2. Severity of infection is not a correlate of the CD4 T cells response. The disease severity score, calculated based on symptomology, as described in Table 1 (x-axis) was plotted against the IFNg CD4 T cell responses to the total SARS2 response (A), the spike response (B) and the three classes of proteins (structural, accessory and non-structural (C,D and E, respectively)). The r and p values shown in the left corner of each panel were calculated using the Spearman correlation.

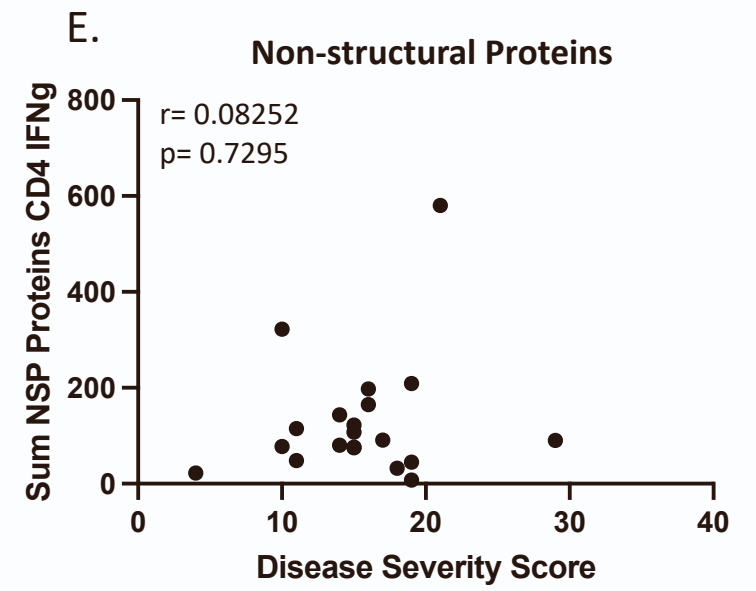

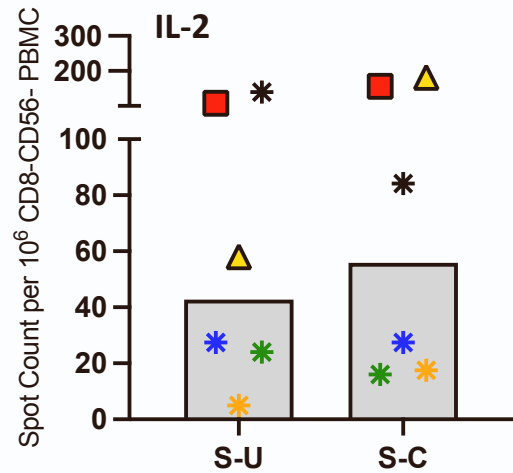

Supplemental Figure 3. *IL-2 production of CD4 T cells to conserved peptides shared between sCoV OC43 and SARS-CoV-2 vs. peptides unique to SARS-CoV-2* Curated pools of peptides representing unique and conserved regions of the spike protein were designed based on alignments between seasonal CoV OC43 and SARS-CoV-2 (see supplemental Table 2). Each pool contained an equal number of peptides. CD4 T cell responses from 6 subjects following PCR confirmed SARS-CoV-2 infection (April-May 2020) at a convalescent time point were quantified by IL-2 EliSpot. (IFN- $\gamma$  responses are shown in Figure 8) Shown are the spot counts per million CD8- and CD56- depleted PBMC with background subtracted. The median CD4 T cell response to each peptide pool is shown as a grey bar and individual subjects are indicated by unique symbols.
